# Supplementary material for: β-Glucuronidase Pattern Predicted From Gut Metagenomes Indicates Potentially Diversified Pharmacomicrobiomics
Source: PubMed Central journal article supplement (PMC8928169; doi:10.3389/fmicb.2022.826994), 2022-03-03
Supplement: Data_Sheet_3.pdf [file Data_Sheet_3.pdf]

# $\beta$ -glucuronidase pattern predicted from gut metagenomes indicates potentially diversified pharmacomicrobiomics

Francesco Candeliere<sup>a</sup>, Stefano Raimondi<sup>a</sup>, Raffaella Ranieri<sup>a</sup>, Eliana Musmeci<sup>a</sup>, Alfonso Zambon<sup>b</sup>, Alberto Amaretti<sup>a,c</sup>, Maddalena Rossi<sup>a,c,\*</sup>

<sup>a</sup> Department of Life Sciences, University of Modena and Reggio Emilia, Modena, Italy

<sup>b</sup> Department of Chemistry and Geological Sciences, University of Modena and Reggio Emilia, Modena, Italy

<sup>c</sup> Biogest-Siteia, University of Modena and Reggio Emilia, Modena, Reggio Emilia, Italy

\* Correspondance:

maddalena.rossi@unimore.it

## *Supplementary Material*

**Supplementary Table S1.** Accession numbers of the 60 metagenomes utilized in this work. Number and length of reads are reported. First three letters in sample's name indicate one of the five cohorts: China (CHN), Ethiopia (ETH), Spain (ESP), Sweden (SWE), and United States of America (USA).

| Sample | Accession number | Reads length | N° reads |
|--------|------------------|--------------|----------|
| SWE-01 | ERS554193        | 100          | 1.27E+08 |
| CHN-02 | SRR10680552      | 150          | 2.55E+07 |
| ETH-03 | SRR8784372       | 100          | 3.43E+07 |
| CHN-04 | SRR10680551      | 150          | 2.59E+07 |
| CHN-05 | SRR10680550      | 150          | 2.47E+07 |
| CHN-06 | SRR10680549      | 150          | 2.74E+07 |
| CHN-07 | SRR10680548      | 150          | 2.66E+07 |
| CHN-08 | SRR10680547      | 150          | 3.03E+07 |
| CHN-09 | SRR10680545      | 150          | 2.90E+07 |
| ETH-10 | SRR8784387       | 100          | 1.94E+07 |
| ETH-11 | SRR8784374       | 100          | 2.35E+07 |
| ETH-12 | SRR8784376       | 100          | 2.99E+07 |
| ETH-13 | SRR8784385       | 100          | 3.02E+07 |
| ETH-14 | SRR8784383       | 100          | 4.57E+07 |
| ETH-15 | SRR8784379       | 100          | 2.50E+07 |

| Sample | Accession number | Reads length | N° reads |
|--------|------------------|--------------|----------|
| SWE-16 | ERR636369        | 100          | 9.12E+07 |
| SWE-17 | ERR636383        | 100          | 7.10E+07 |
| SWE-18 | ERR636385        | 100          | 1.03E+08 |
| SWE-19 | ERR636375        | 100          | 1.78E+08 |
| SWE-20 | ERR636405        | 100          | 8.48E+07 |
| SWE-21 | ERR636371        | 100          | 9.41E+07 |
| SWE-22 | ERR636411        | 100          | 8.67E+07 |
| SWE-23 | ERR636351        | 100          | 5.67E+07 |
| SWE-24 | ERR636373        | 100          | 7.78E+07 |
| SWE-25 | ERR636353        | 100          | 1.12E+08 |
| SWE-26 | ERR636391        | 100          | 6.57E+07 |
| SWE-27 | ERR636389        | 100          | 9.99E+07 |
| SWE-28 | ERR636355        | 100          | 1.01E+08 |
| SWE-29 | ERR636359        | 100          | 8.42E+07 |
| SWE-30 | ERR636363        | 100          | 9.76E+07 |
| CHN-31 | SRR10680544      | 150          | 2.51E+07 |
| CHN-32 | SRR10680543      | 150          | 2.93E+07 |
| CHN-33 | SRR10680542      | 150          | 2.76E+07 |
| CHN-34 | SRR10680541      | 150          | 2.73E+07 |
| CHN-35 | SRR10680540      | 150          | 2.49E+07 |
| CHN-36 | SRR10680445      | 150          | 2.50E+07 |
| CHN-37 | SRR10680443      | 150          | 2.73E+07 |
| CHN-38 | SRR10680442      | 150          | 2.73E+07 |
| CHN-39 | SRR10680441      | 150          | 2.49E+07 |
| CHN-40 | SRR10680439      | 150          | 2.50E+07 |
| ETH-41 | SRR8784390       | 100          | 2.50E+07 |
| ESP-42 | ERR3452699       | 150          | 2.31E+07 |
| ESP-43 | ERR3452574       | 150          | 3.12E+07 |
| ESP-44 | ERR3452529       | 150          | 3.37E+07 |
| ESP-45 | ERR3452318       | 150          | 3.14E+07 |
| ESP-46 | ERR3451635       | 150          | 3.60E+07 |
| ESP-47 | ERR3450606       | 150          | 3.45E+07 |
| ESP-48 | ERR3450296       | 150          | 2.54E+07 |
| ESP-49 | ERR3450229       | 150          | 4.47E+07 |
| ESP-50 | ERR3450203       | 150          | 2.72E+07 |
| ETH-51 | SRR8784391       | 100          | 2.28E+07 |
| ETH-52 | SRR8784395       | 100          | 2.42E+07 |
| ETH-53 | SRR8784394       | 100          | 1.72E+07 |
| USA-54 | ERR2641799       | 150          | 1.37E+07 |
| USA-55 | ERR2641792       | 150          | 9.17E+06 |
| USA-56 | ERR2641793       | 150          | 9.40E+06 |
| USA-57 | ERR2641795       | 150          | 1.22E+07 |
| USA-58 | ERR2641798       | 150          | 1.92E+07 |
| USA-59 | ERR2641800       | 150          | 1.11E+07 |

| Sample | Accession number | Reads length | N° reads |
|--------|------------------|--------------|----------|
| USA-60 | ERR2641801       | 150          | 1.04E+07 |

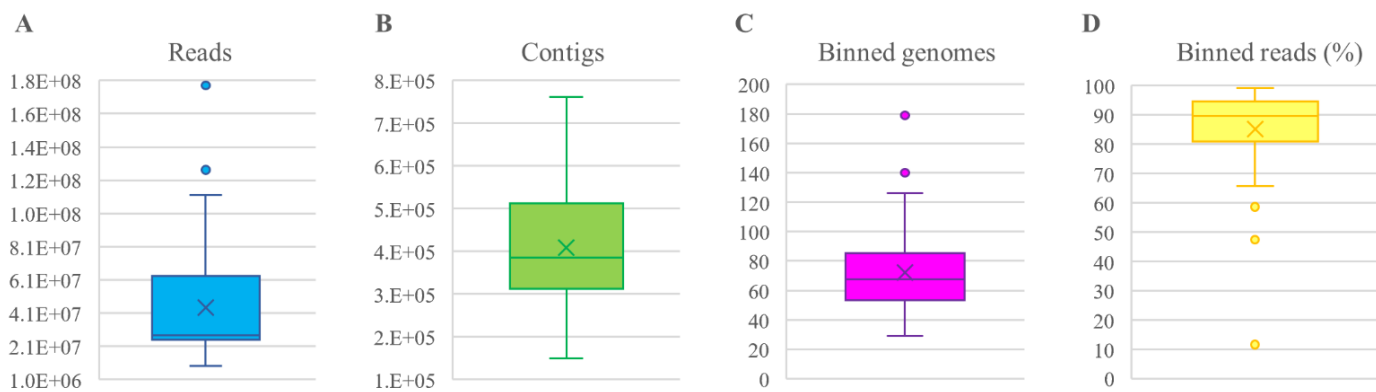

**Supplementary Figure S1.** Metagenomic data of the 60 microbiomes: the mean (X), the median (central line), the 25th and 75th percentiles (colored box), the 10th and 90th percentiles (whiskers), and the outliers (dots) are indicated. A: number of reads; B: number of contigs obtained by metaSPAdes assembly; C: number of bins reconstructed by MaxBin2; D: reads mapped on the binned contigs by Bowtie2 (%).

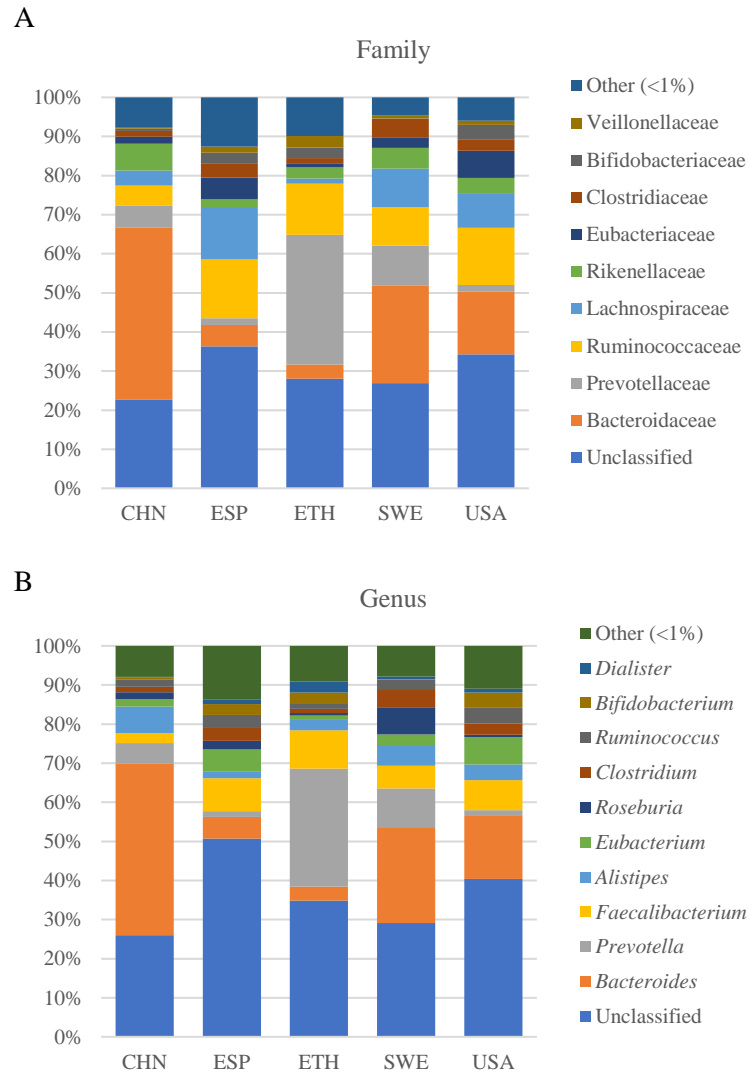

**Supplementary Figure S2.** Mean relative abundance of the main families (A) and genera (B) identified in the whole dataset and in the five cohorts.

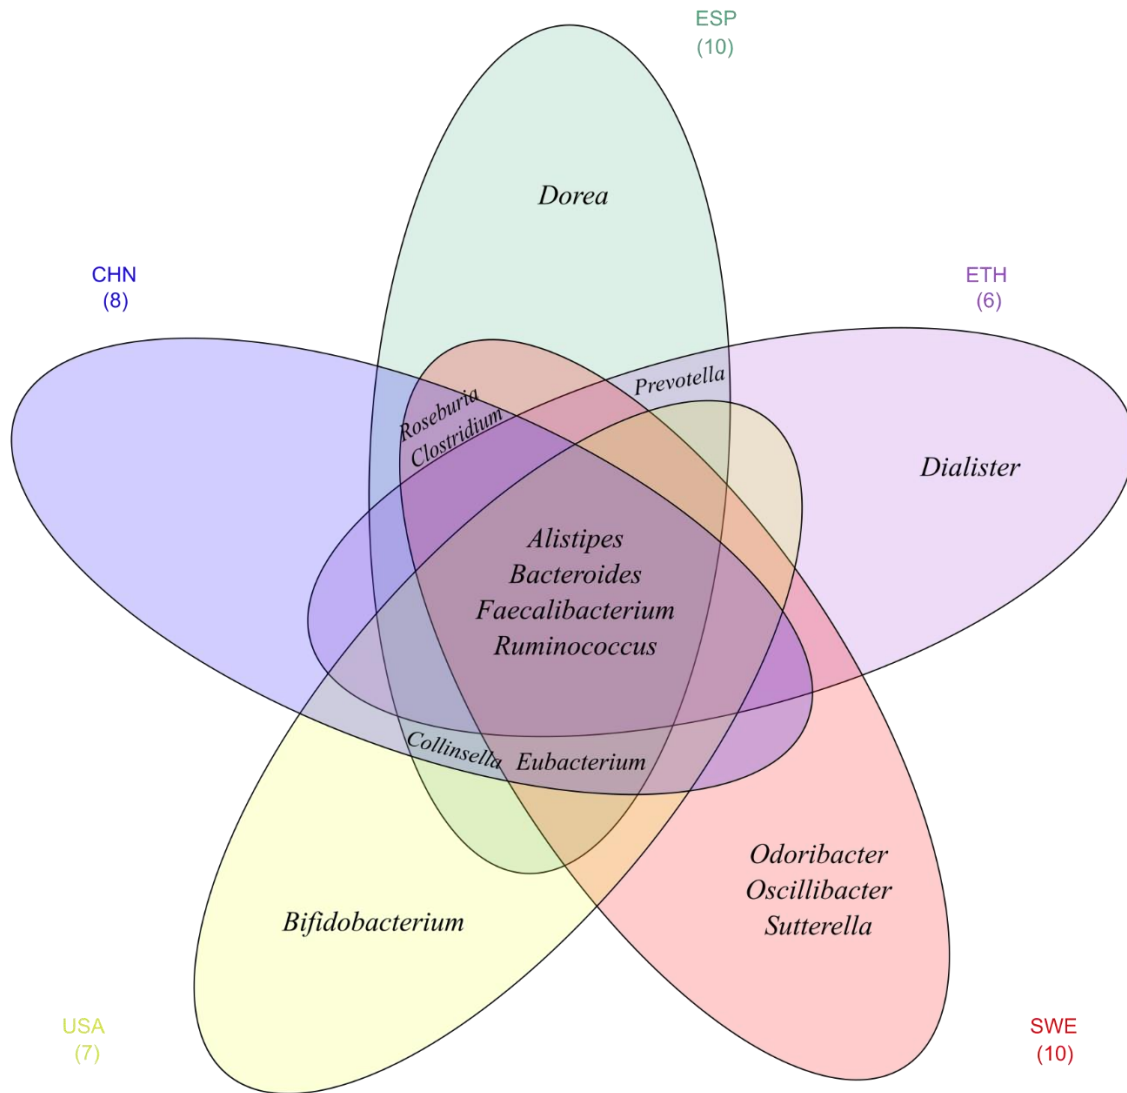

**Supplementary Figure S3.** Venn's diagram of core genera identified in each cohort.

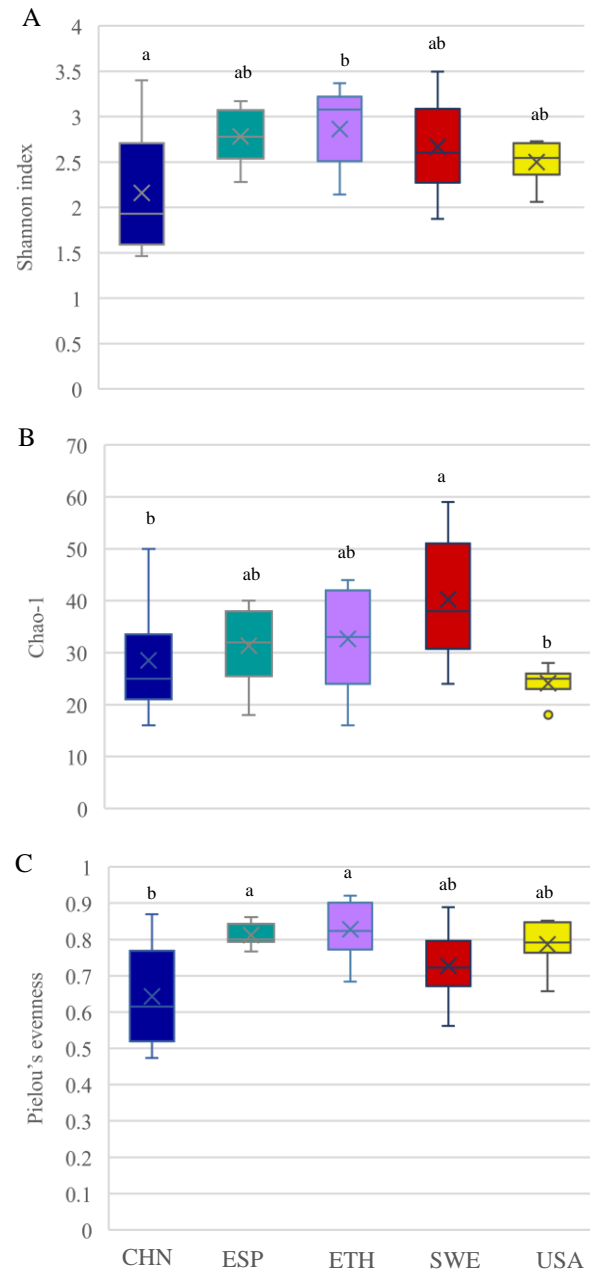

**Supplementary Figure S4.** Alpha diversity based on Shannon index (A), Chao-1 index (B) and Pielou's evenness (C). Cohorts sharing the same letter did not significantly differ ( $P \geq 0.05$ , Kruskal-Wallis, Dunn).

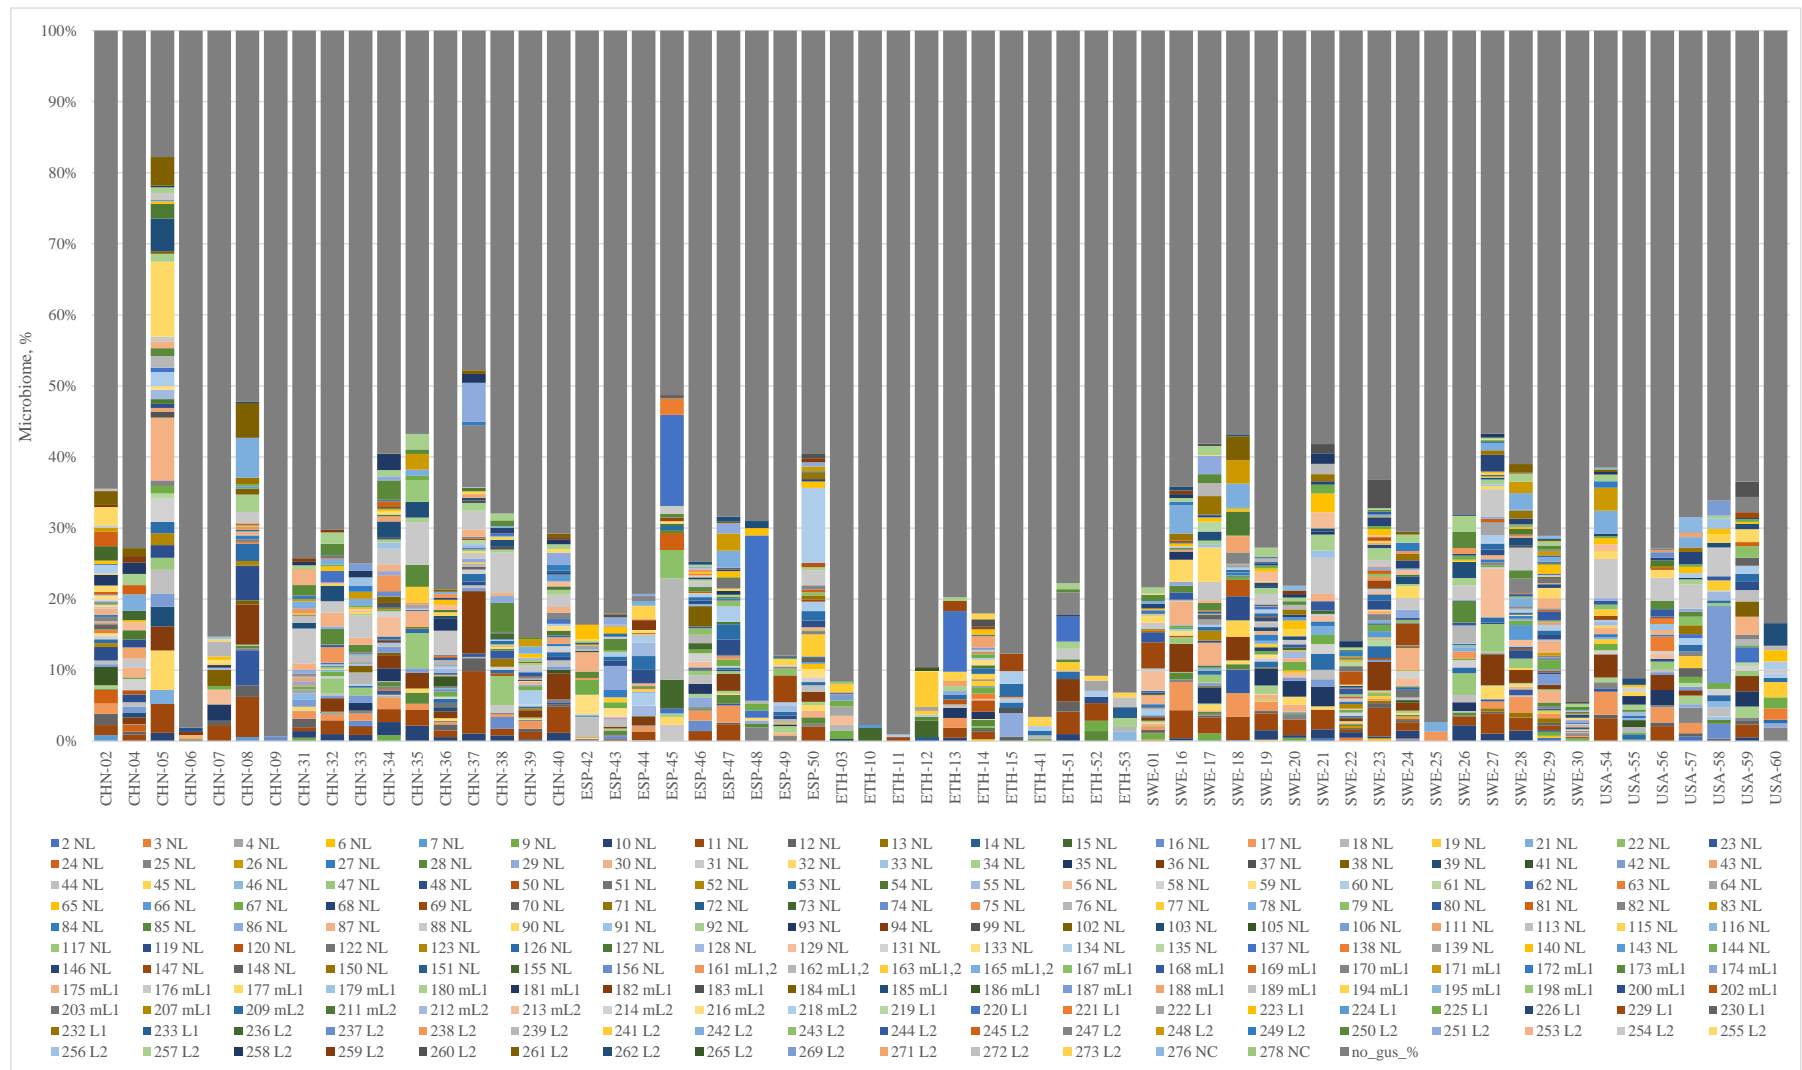

**Supplementary Figure S5.** Distribution of GUS sequences in the microbiome of 60 subjects. The name of the species corresponding to each sequence can be found in Supplementary Datasheet S2
